# Supplementary material for: Enabling high electrochemical activity of a hollow SiO2anode by decorating it with ultrafine cobalt nanoparticles and a carbon matrix for long-lifespan lithium ion batteries
Source: Royal Society of Chemistry journal article supplement (doi:10.1039/d0nr02345k), 2020-01-01
Supplement: d0nr02345k1.pdf [file d0nr02345k1.pdf]

## Supporting information

### **Enabling high electrochemical activity of hollow SiO<sub>2</sub> anode by decorating with ultrafine cobalt and carbon matrix for long-lifespan lithium ion batteries**

Mengyao Zhu,<sup>a,1</sup> Yabin Shen,<sup>b,1</sup> Limin Chang,<sup>a\*</sup> Dongming Yin,<sup>b\*</sup> Yong Cheng,<sup>b\*</sup>  
Limin Wang,<sup>ab</sup>

<sup>a</sup> Key Laboratory of Preparation and Applications of Environmental Friendly Materials (Jilin Normal University), Ministry of Education, Changchun 130103, China

<sup>b</sup> State Key Laboratory of Rare Earth Resource Utilization, Changchun Institute of Applied Chemistry, Chinese Academy of Sciences (CAS), Changchun 130022, China

\*Corresponding author. [lmchang@jlnu.edu.cn](mailto:lmchang@jlnu.edu.cn) (L. Chang)

\*\*Corresponding author. [dmyin@ciac.ac.cn](mailto:dmyin@ciac.ac.cn) (D. Yin), [cyong@ciac.ac.cn](mailto:cyong@ciac.ac.cn) (Y. Cheng)

<sup>1</sup> Yabin Shen and Mengyao Zhu contributed equally to this work.

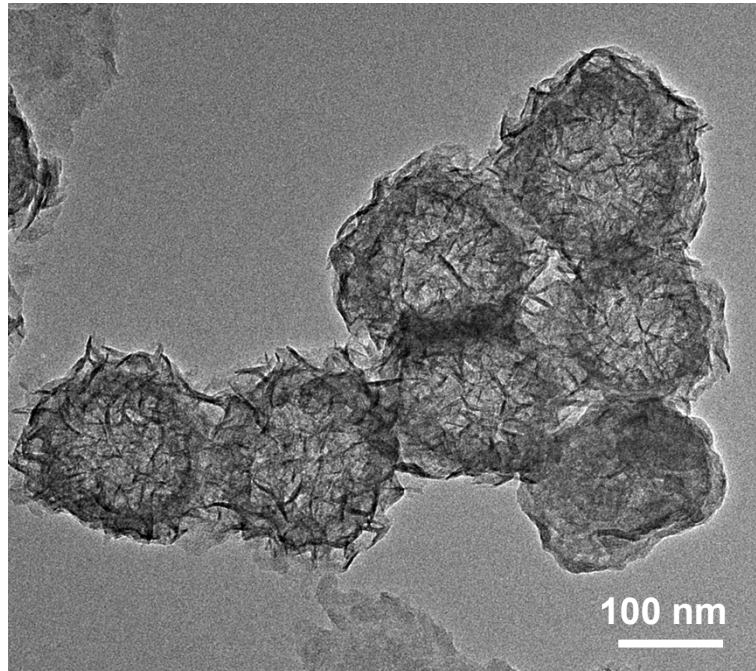

**Fig. S1** TEM image of pristine SiO<sub>2</sub>/C hierarchical hollow spheres.

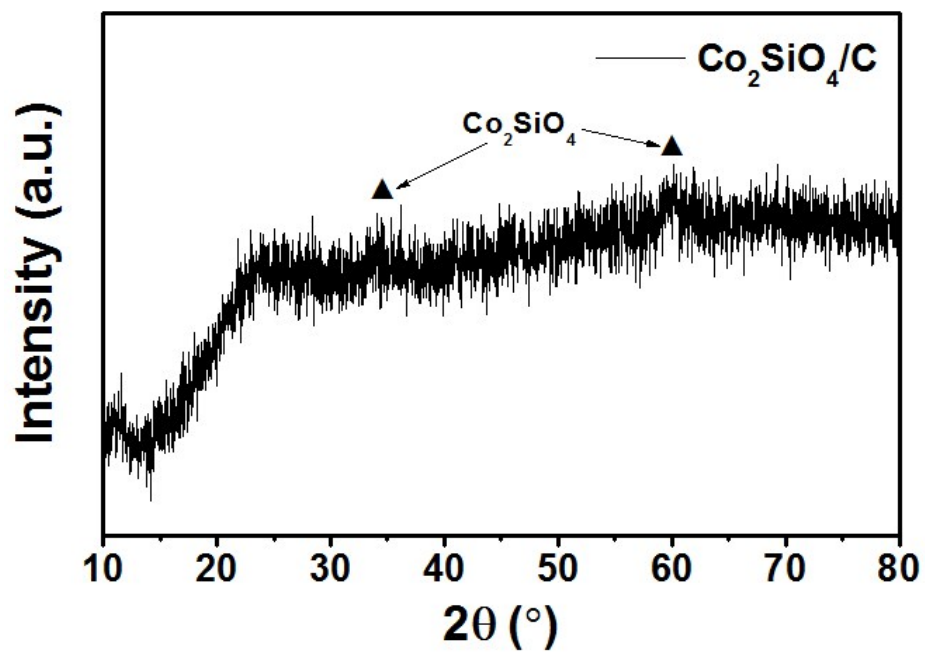

Fig. S2 XRD pattern of the Co<sub>2</sub>SiO<sub>4</sub>/C intermediate.

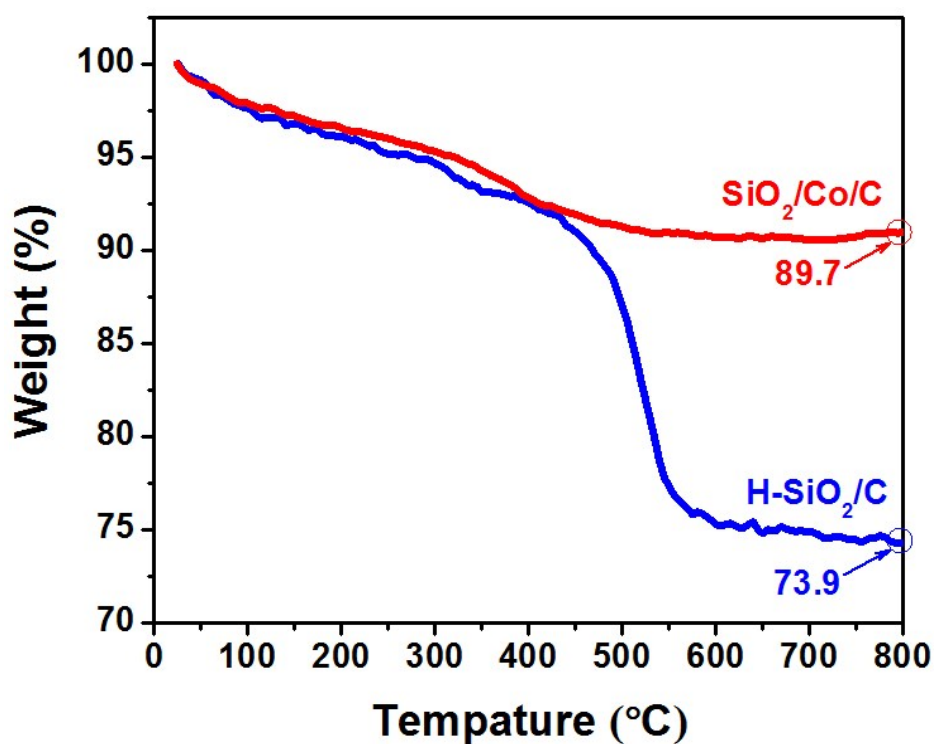

Fig. S3 TG curves of the SiO<sub>2</sub>/Co/C and H-SiO<sub>2</sub>/C composites.

After TG test in air atmosphere, the final products of the SiO<sub>2</sub>/Co/C and H-SiO<sub>2</sub>/C composites are SiO<sub>2</sub>/Co<sub>3</sub>O<sub>4</sub> and SiO<sub>2</sub>, respectively. According to the following equations and mass changes revealed from the TG result (Fig. S3), the specific contents of SiO<sub>2</sub>, Co and C in the SiO<sub>2</sub>/Co/C composite can be calculated to be 55.1, 25.4 and 19.5 wt. % based on the following three equations.

$$\text{SiO}_2 \text{ (wt. \%)} + \text{Co (wt. \%)} + \text{C (wt. \%)} = 100 \quad (1)$$

$$\text{SiO}_2 \text{ (wt. \%)} / \text{C (wt. \%)} = 73.9 / 26.1 \quad (2)$$

$$\text{SiO}_2 \text{ (wt. \%)} + \text{Co}_3\text{O}_4 \text{ (molecular weight)} / 3 \text{ Co (molecular weight)} \times \text{Co (wt. \%)} = 89.7 \quad (3)$$

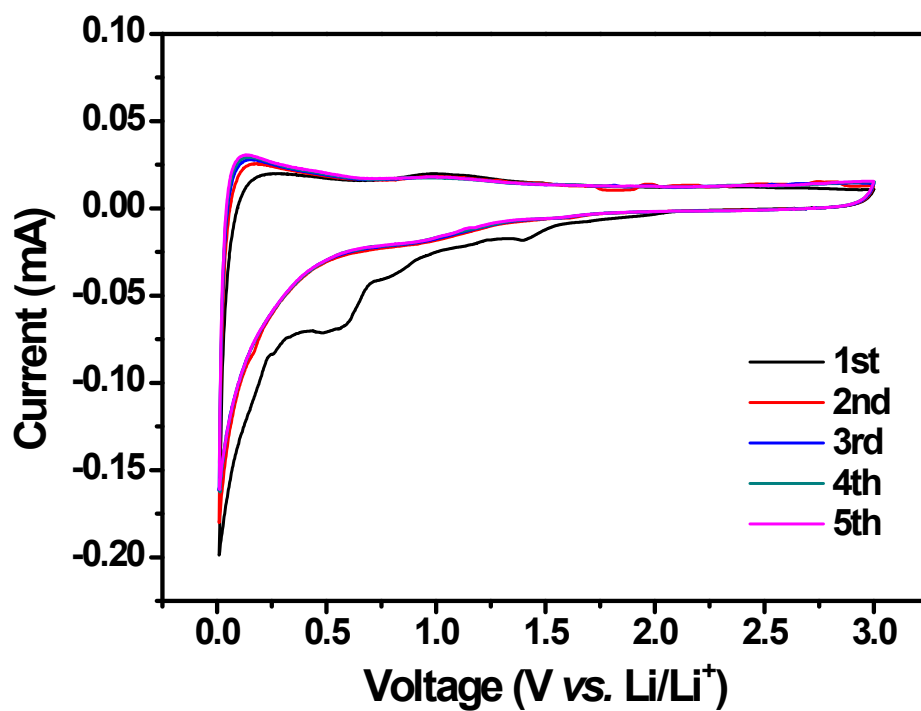

**Fig. S4** CV curves of pristine H-SiO<sub>2</sub>/C at a scan rate of 0.1 mV s<sup>-1</sup> in the potential range from 3.0 to 0.01 V vs. Li<sup>+</sup>/Li.

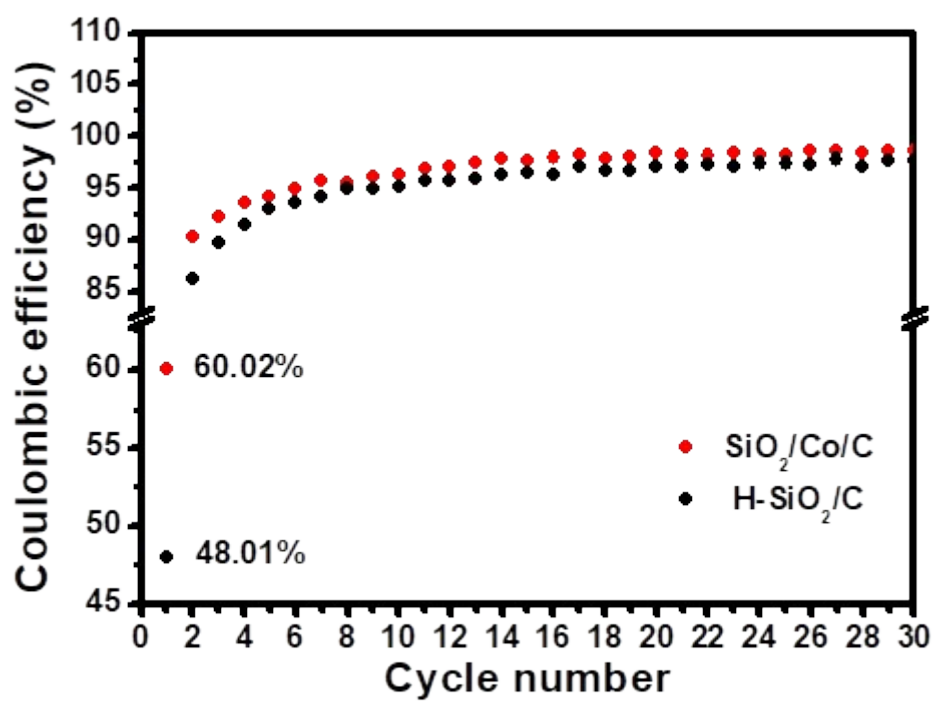

Fig. S5 Coulomb efficiency of SiO<sub>2</sub>/Co/C and pristine H-SiO<sub>2</sub>/C for the first 30 cycles.

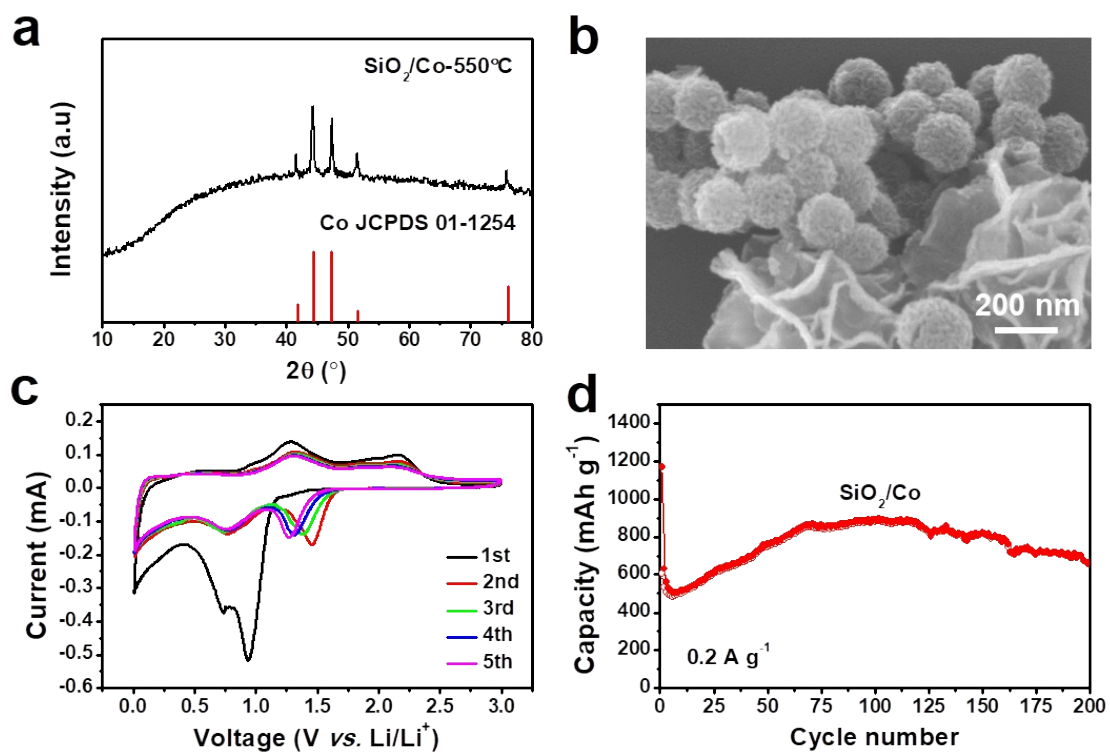

Fig. S6 (a)XRD pattern, (b) SEM image, (c) CV curves and (d) cycling performance of the  $\text{SiO}_2/\text{Co}$  composite.

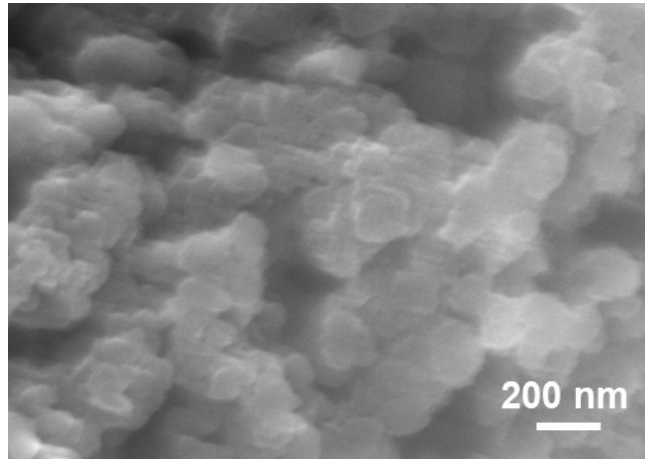

**Fig. S7** SEM image of SiO<sub>2</sub>/Co/C after 50 discharge/charge cycles at 0.2 A g<sup>-1</sup>.



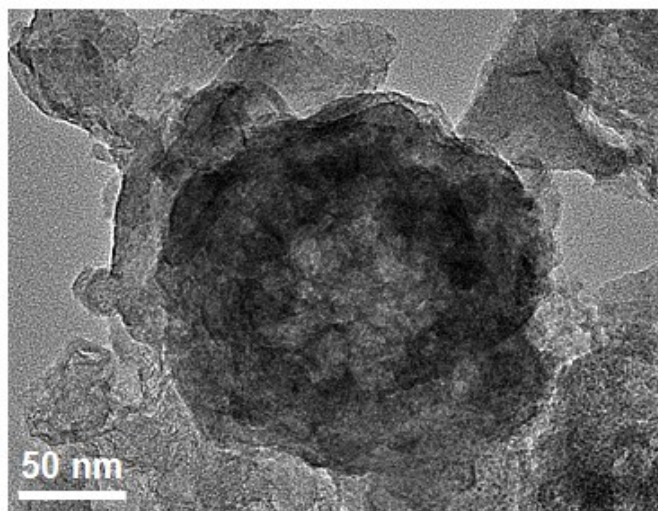

**Fig. S8** TEM image of  $\text{SiO}_2/\text{Co}/\text{C}$  after 20 discharge/charge cycles at  $0.2 \text{ A g}^{-1}$ .

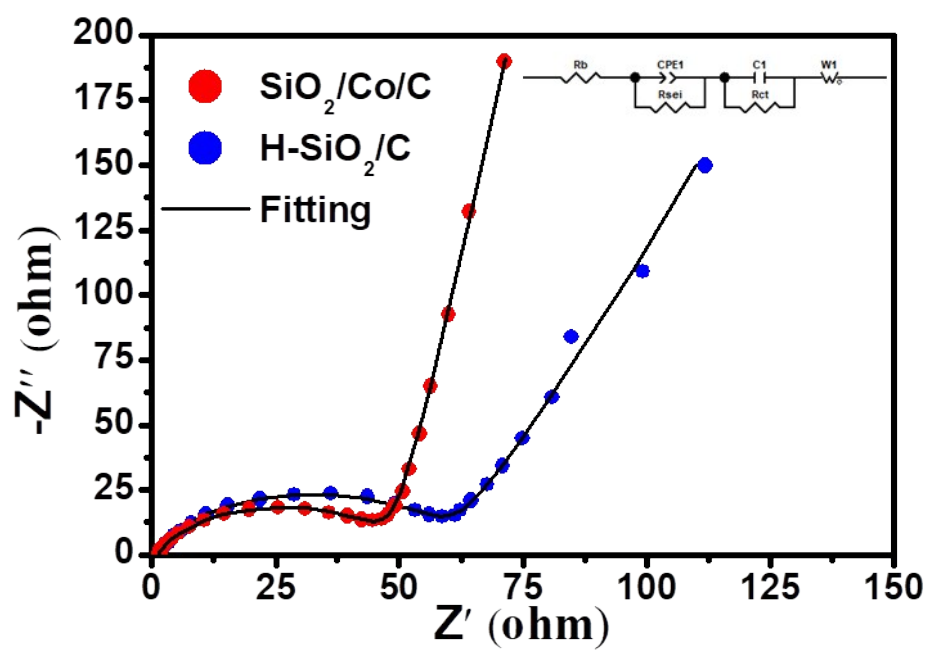

Fig. S9 Nyquist plots of SiO<sub>2</sub>/Co/C and pristine H-SiO<sub>2</sub>/C.

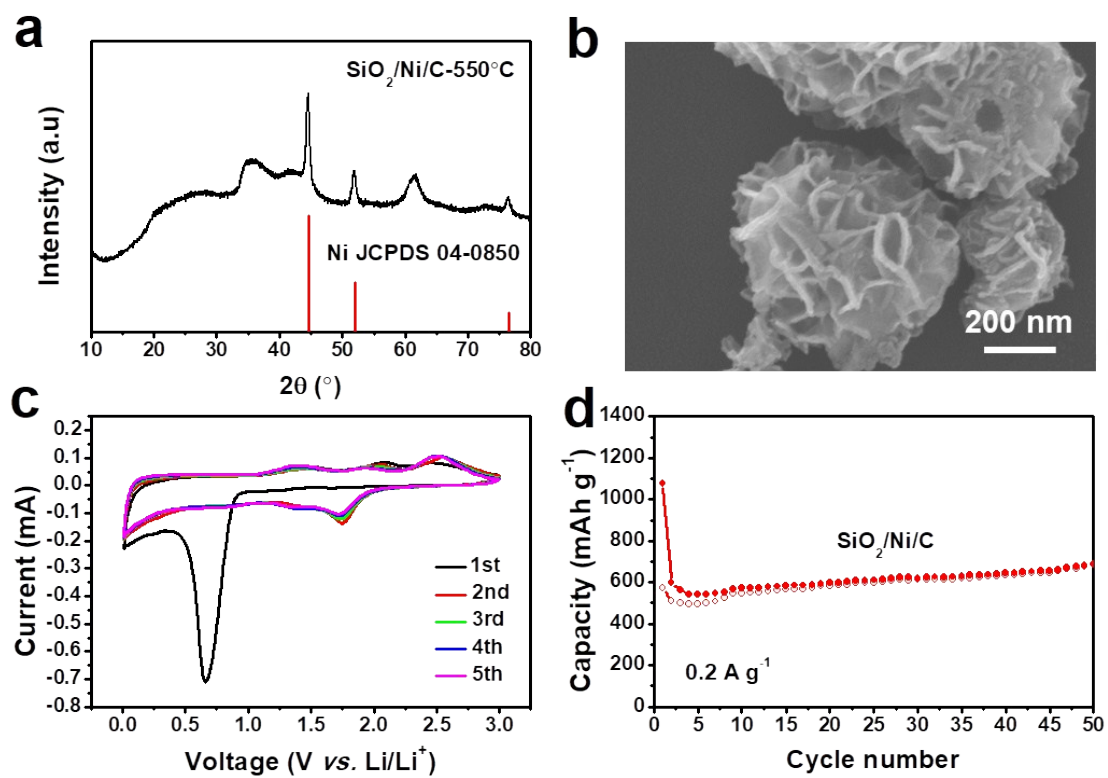

**Fig. S10** (a)XRD pattern, (b) SEM image, (c) CV curves and (d) cycling performance of the  $\text{SiO}_2/\text{Ni}/\text{C}$  composite.

Table S1 Comparison of lithium storage properties of various SiO<sub>2</sub>-based anode materials.

| SiO <sub>2</sub> -based anode materials  | Current density (A g <sup>-1</sup> ) | Capacity (mAh g <sup>-1</sup> ) | Cycle number | Rate capability (mAh g <sup>-1</sup> ) | Ref. |
|------------------------------------------|--------------------------------------|---------------------------------|--------------|----------------------------------------|------|
| nanofibrous SiO <sub>2</sub> /C          | 0.1                                  | 400                             | 200          | 263 (0.5 A g <sup>-1</sup> )           | 22   |
| N-OMC/SiO <sub>2</sub>                   | 0.2                                  | 630                             | 100          | 372 (0.5 A g <sup>-1</sup> )           | 25   |
| hollow porous SiO <sub>2</sub>           | 0.1                                  | 919                             | 30           | 377 (0.5 A g <sup>-1</sup> )           | 27   |
| hollow porous SiO <sub>2</sub> nanobelts | 0.1                                  | 1012                            | 100          | 390 (1.0 A g <sup>-1</sup> )           | 28   |
| HSiO <sub>2</sub> @CN                    | 0.2                                  | 810                             | 100          | 378 (5.0 A g <sup>-1</sup> )           | 30   |
| SiO <sub>2</sub> /Cu/PAN-C               | 0.11                                 | 450                             | 185          | 352 (0.44 A g <sup>-1</sup> )          | 31   |
| multi-shell hollow SiO <sub>2</sub>      | 0.1                                  | 750                             | 500          | 289 (1.0 A g <sup>-1</sup> )           | 33   |
| H-SCC                                    | 0.05                                 | 776.1                           | 100          | 492 (0.5 A g <sup>-1</sup> )           | 35   |
| Ni/SiO <sub>2</sub>                      | 0.1                                  | 676                             | 50           | 337 (10.0 A g <sup>-1</sup> )          | 43   |
| SiO <sub>2</sub> /Sb@CNF                 | 0.2                                  | 700                             | 400          | 520 (2.0 A g <sup>-1</sup> )           | S1   |
| SiO <sub>2</sub> /MXene microspheres     | 0.2                                  | 799                             | 100          | 517 (3.0 A g <sup>-1</sup> )           | S2   |
| SiO <sub>2</sub> -C                      | 0.1                                  | 693                             | 100          | 232 (1.5 A g <sup>-1</sup> )           | S3   |
| SiO <sub>x</sub> /C                      | 0.1                                  | 550                             | 180          | 390 (0.8 A g <sup>-1</sup> )           | S4   |
| silica/carbon                            | 0.1                                  | 820                             | 100          | 255 (5.0 A g <sup>-1</sup> )           | S5   |
| SiO <sub>2</sub> /Co/C                   | 0.2                                  | 1050                            | 200          | 439 (5.0A g <sup>-1</sup> )            | This |
|                                          | 1.0                                  | 548                             | 1000         |                                        | work |

#### References

- [S1] H. Wang, X. Yang, Q. Wu, Q. Zhang, H. Chen, H. Jing, *ACS Nano*, 2018, 12, 3406.
- [S2] G. Mu, D. Mu, B. Wu, C. Ma, J. Bi, L. Zhang, H. Yang, F. Wu, *Small*, 2020, 16, 1905430.
- [S3] S. Ali, S. Jaffer, I. Maitlo, F. K. Shehzad, Q. Wang, M. Y. Akram, Y. He, J. Nie, *J. Alloy. Compoud.*, 2020, 812, 152127.
- [S4] B. Zhang, H. Wang, C. Liu, D. Li, H. K. Kim, C. Harris, C. Y. Lao, A. Abdelkader, K. Xi, *J. Alloy. Compoud.*, 2019, 801, 658.
- [S5] X. Yang, H. Ma, G. Zhang, X. Li, *Adv. Mater. Interfaces*, 2019, 6, 1801809.
